# Supplementary material
Source: publisher site journal article supplement (https://www.dovepress.com/article/359777)
Supplement: Supplementary file 1 [file get_supplementary_file.php]

# **Supplementary materials**

# **FOCUS GROUP DISCUSSION GUIDE - Micro-research Students**

**Evaluating acceptability, appropriateness, feasibility, and implementation process of the HEPI-TUITAH Micro-research program**

1. What is your opinion about the HEPI-TUITAH micro-research program? *Probe for:*
   1. Process followed to recruit student teams
   2. Experience with team formation,
   3. Team leadership
   4. Concept development process
2. What aspects of HEPI-TUITAH micro-research activities motivate you if any? *Probe for:*
   1. What demotivates you?
   2. What areas need improvement?
   3. What would be your suggestions?
3. What is your assessment about Lecturers/mentors interest in the micro-research activities for undergraduate students?
4. How beneficial are the HEPI-TUITAH micro-research training activities to the undergraduate students?
5. Tell me about your mentors’ commitment to support the micro-research teams in implementing the HEPI-TUITAH micro-research program. *Probe for:*
   1. Any possible barriers
   2. Facilitators
   3. What should be done differently on the side of the mentor?
   4. What should be done differently on the side of the students?
6. How do you manage to balance micro-research activities with your regular classes? *Probe:*
   1. What challenges do you face?
   2. How have you managed to keep the momentum?
   3. Based on your experience, what advice would you give to the next cohort of students?

1. Tell me how the HEPI-TUITAH Micro-research training activities increased your knowledge and skills (if at all). *Probe for:*
   1. Proposal development, budgeting, and financial management training
   2. Data analysis and manuscript writing training
   3. Responsible conduct of research training
2. What do you have to say to the University management about micro-research activities for undergraduate students after the HEPI-TUITAH program?
3. What is your opinion about the pre-dissemination conference training you went through?

*Probe for*

- 1. Presentation skills and confidence
  2. Suggestions for improvement?

1. What do you think about the inter professional education approach HEPI-TUITAH uses for the Micro-research activities? *Probe for:*
   1. Challenges encountered and how have you overcome them?
   2. Suggestions for improvement?

# **FOCUS GROUP DISCUSSION – Micro-research MENTORS**

**Evaluating acceptability, appropriateness, feasibility, and implementation process of the HEPI-TUITAH Micro-research**

1. What do you think about the HEPI-TUITAH micro-research program? *Probe for:*
   1. fit for undergraduate health professions students
   2. benefit to the students
2. What do you have to say about the inter professional education approach HEPI-TUITAH uses for the micro-research activities? *Probe for:*
3. What is your opinion about the HEPI-TUITAH micro-research program? *Probe for:*
4. Process of team formation and assigning of mentors
5. Research capacity trainings (Proposal development, data analysis, manuscript writing, RCR)
6. Data collection process
7. What would you say about the organization and presentation of the micro-research learning materials to the students? *Probe for:*
   1. Mode of delivery (in-person and online)
   2. Ease to use
   3. Applicability in relation to their career
   4. How differently can they be organized and presented?
8. What modifications should be made to the HEPI-TUITAH micro-research training activities to make them more beneficial to the undergraduate students?
9. What do you have to say about the HEPI-TUITAH mentoring program and expectations? *Probe for*
   1. Level of involvement expected at in all processes
   2. Commitment on the part of mentors
   3. Commitment on the part of student teams
   4. What challenges do you face?
   5. What should be done differently?
10. What would be the best approaches for mentors to support the micro-research teams?

*Probe for:*

- 1. What challenges have you faced with your micro-research teams?
  2. What has worked well for you in the mentoring relationship?
  3. What do you think the HEPI-TUITAH administration should do differently to enrich the mentor-mentee relationship?

1. What do you think about the mentor sessions hosted by our international partners?

*Probe for*

- 1. How beneficial? How best should these sessions run?
  2. What would you wish to learn from such sessions?
  3. Suggestions about working relationship with the international partners.

1. What is your opinion about the students’ ability to balance micro-research activities with regular classes? *Probe for:*
   1. How have you managed to keep the momentum with your research teams?
   2. What should be done to lighten the demands?
   3. Based on your experience, what advice would you give to other mentors?

1. What do you have to say to the University management about micro-research activities for undergraduate students after the HEPI-TUITAH program?
2. What is your opinion about the pre-dissemination conference training for the student?

*Probe for*

- 1. Presentation skills and confidence
  2. Suggestions for improvement?

1. What do you think about the inter professional education approach HEPI-TUITAH uses for the Micro-research activities? *Probe for:*
   1. suitability (program and years of study)
   2. what are the advantages?
   3. What are the disadvantages?
